# Supplementary material
Source: publisher figshare collection journal article supplement (https://acs.figshare.com/ndownloader/files/9528733)
Supplement: Supplementary file 1 [file 9528733]

## Sheet: Supp Table S1
Supplementary Table S1: Participant clinical features and placenta samples used in different experiments
	Patient ID	Sample keys	Age (year)	Weight（kg）	Height（cm）	BMI	Gestational age at birth (weeks)	Fetal sex	Fetal birth weight（g）	SBP（mmHg）	DBP（mmHg）	UA（μmol/L）	ALT（U/L）	AST（U/L）	Creatinine（μmol/L）	PLT（10^9/L）	HGB（g/L）	Glucose(mmol/L)	MS	IB
Normal	131470	N01	35	40	160	15.625	39+0	male	3230	127	78	348	12.4	18	62	252	100	5.89
	173535	N02	32	63.5	161	24.4975	39+1	male	2930	119	74	310	5.9	13.8	67	219	117	4.85
	200868	N03	25	58	161	22.3757	39+0	female	3270	118	75	326	9.7	15.6	35	129	105	4.55
	259296	N04	35				38+4	female	3720	110	66	188	12.3	17.9	44	186	82	4.29
	259484	N05	28	53	160	20.7031	38+3	male	3300	134	67	280.4	9.9	17.7	44	320	119	6.69
	121159	N06	35	78	176	25.1808	39+3	male	3520	124	69	344	20.3	27.4	95	277	137	6.93
	270087	N07	36	64	156	26.2985	39+0	male	3700	107	59	347	10.1	14.7	63	148	75	6.14
	269530	N08	24	57.5			39+2	female	3410	125	75	233.6	4.8	7.3	43	177	113	4.27
	225083	N09	34	95	179	29.6495	39+5	female	3180	111	77	346.2	6.8	10.8	54	222	111	5.98
	258557	N10	41	54			39+0	female	3380	121	72	361.2	30.3	32.1	53	159	122	7.61
	238761	N11	27	40	150	17.7778	40+6	male	3550	110	72	434	7.6	12.9	55	77	80	5.64
	270096	N12	22	43	160	16.7969	39+2	female	3150	104	67	223.4	6.4	11.8	44	257	99	4.97
	270830	N13	22	53	173	17.7086	39+2	female	3690	102	66	304	3.4	10.9	59	209	112	5.99
	270886	N14	33				38+6	female	3130	106	67	251	11.6	13.8	54	265	65	4.43
	163262	N15	37	58	157	23.5304	39+1	male	3440	109	63	277	13.2	13.7	46	192	115	5.7
	270022	N16	27	50	160	19.5312	39+5	female	3050	112	67	343	5.5	16.4	58	316	86	4.42
	145103	N17	33	50	146	23.4566	39+2	male	3200	102	66	317	6.8	12.3	45	194	89	4.76
PE	265878	P01	22	43			36+6	male	2580	140	90	342	9.6	19.7	56	271	94	4.12
	258490	P02	35	51.5	153	22.0001	36+3	female	2240	190	109	379	8	16	41	201	126	4.34
	259376	P03	31	72.5	155	30.1769	35+4	male	2400	158	90	403	23.2	18	50	267	110	4.54
	172365	P04	31	80	160	31.25	38+1	male	2870	185	100	398	1.5	10.6	39	349	117	7.06
	258537	P05	30	40	154	16.8663	35+1	female	1630	170	130	571	17.8	29.5	89	165	123	7.41
	269974	P06	31	58	165	21.3039	35+0	female	1970	156	107	474	8.7	11.3	71	146	115	5.17
	258378	P07	41	50	153	21.3593	29+1	male	1020	142	97	688.5	48.2	31.8	99	209	119	5.78
	141854	P08	35	50			36+1	female	2175	168	106	618	5.9	15	59	149	87	3.67
	258745	P09	38	45	148	20.5442	31+0	male	1250	158	92	658	247.7	386.7	113	29	160	8.24
	261477	P10	24	55	156	22.6003	32+0	female	800	162	93	284	40.4	23.9	71	161	114	5.84
	260123	P11	35	65.7	162	25.0343	36+6	male	2530	156	111	336	14.6	18.2	83	158	96	9.7
	261670	P12	36	60	160	23.4375	33+0	male	1660	144	88	554	12.9	14	85	289	117	8.69
	261563	P13	21	45	160	17.5781	28+5	male	1030	166	114	503.5	10.4	17.7	61	229	122	6.15
	265671	P14	35	65			33+5	female	1320	146	82	337	14.7	15.5	46	152	115	3.9
	261003	P15	29	53	161	20.4467	35+2	female	1680	194	109	405	11.5	19.6	67	197	146	3.78
	Notes:
	MS and IB represent samples used in mass spectrometry and immunoblotting, respectively.

## Sheet: Legend for column heading
Legend for column heading
BMI	body mass index
SBP	systolic blood pressure
DBP	diastolic blood pressure
UA	uric acid
ALT	alanine aminotransferase
AST	aspartate aminotransferase
PLT	platelet
HGB	hemoglobin
